# Supplementary material
Source: Springer Nature journal article supplement (https://www.springermedizin.de/resource/supplementary/12916_2007_137_MOESM2_ESM.pdf/9599252)

In favor of Usual Care + paroxetine (N=85)

In favor of Usual Care (N=96)

Follow-up:

52 weeks

26 weeks

13 weeks

6 weeks

h

g

f

e

d

c

b

a

Per-protocol (N=133)

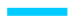

Intention-to-treat (N=181)

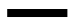

-5

0

+5

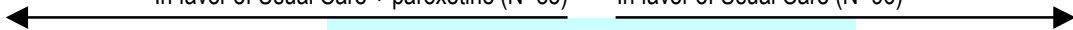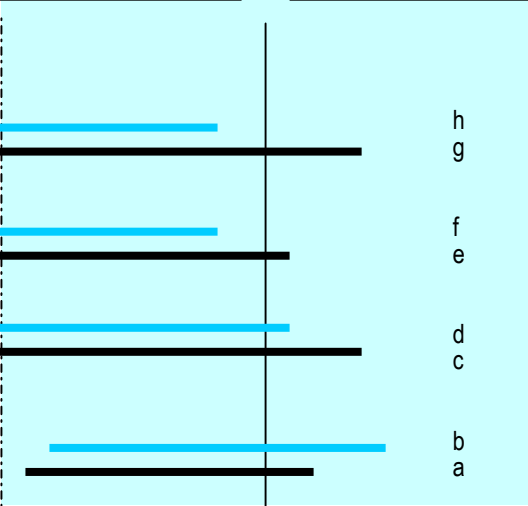

Supplement: MOESM2 [file 9599252]
